# Supplementary material
Source: HighWire-hosted journal article supplement (https://bmjopen.bmj.com/content/13/5/e069494)
Supplement: inline-supplementary-material-1 [file inline-supplementary-material-1.pdf]

**Appendix 1: AFEM-CC Clinical Process and Outcomes Quality Indicators**Clinical Care Quality Indicators

| Indicator                                                           | Definition                                                                                                                                           | Exact match | Near match | No data |
|---------------------------------------------------------------------|------------------------------------------------------------------------------------------------------------------------------------------------------|-------------|------------|---------|
| Antibiotics given for patients with sepsis                          | % of patients with diagnosis of sepsis given antibiotics during EU length of stay                                                                    | ✓           | —          | —       |
| Blood transfusion of patients meeting transfusion criteria          | % of patients meeting local transfusion criteria who receive blood transfusion                                                                       | ✓           | —          | —       |
| Corticosteroid treatment given for asthma patients                  | % of patients with documentation of asthma who receive corticosteroid treatment                                                                      | ✓           | ✓          | —       |
| Bronchodilator treatment give for asthma patients                   | % of patients with documentation of asthma who receive bronchodilator treatment                                                                      | ✓           | ✓          | —       |
| Analgesia given to patients reporting pain                          | % of patients with documentation of pain who receive pain medications                                                                                | ✓           | ✓          | —       |
| Blood glucose checked in patients with change in mental status      | % of patients with documented change in mental status who have blood glucose (BG) checked                                                            | —           | ✓          | —       |
| Supplemental oxygen given for hypoxic patients                      | % of patients with SaO2 <92% who had supplemental oxygen                                                                                             | —           | ✓          | —       |
| Long bone splinting for patients presenting with extremity fracture | % of patients with extremity fracture who are splinted                                                                                               | —           | ✓          | —       |
| Adult patients with shock given IV fluids                           | % of adult patients with SBP < 90 given intravenous fluids (IVF)                                                                                     | —           | —          | ✓       |
| FAST exam performed for blunt abdominal trauma                      | % of patients with chief complaint of blunt abdominal trauma who have documented results of Focused Assessment with Sonography in Trauma (FAST) exam | —           | —          | ✓       |
| Hypoglycemic patients given glucose                                 | % of patients with blood glucose < 70 mg/dL given glucose                                                                                            | —           | —          | ✓       |
| Antibiotics given for pediatric pneumonia                           | % of patients < 5yoa with pneumonia given antibiotics during EU length of                                                                            | —           | —          | ✓       |

|                                                                  |                                                                                                                                  |   |   |   |
|------------------------------------------------------------------|----------------------------------------------------------------------------------------------------------------------------------|---|---|---|
|                                                                  | stay                                                                                                                             |   |   |   |
| Antibiotics given for adults with pneumonia                      | % of adult patients with pneumonia given antibiotics during EU length of stay                                                    | — | — | ✓ |
| Action taken to control postpartum hemorrhage                    | % of patients with postpartum hemorrhage who receive medication to control bleeding                                              | — | — | ✓ |
| Pregnancy test checked in women of reproductive age              | % of female patients of reproductive age with pregnancy test checked                                                             | — | — | ✓ |
| Parental magnesium given to patients with eclampsia/preeclampsia | % of patients with diagnosis of eclampsia or preeclampsia receiving magnesium                                                    | — | — | ✓ |
| Action taken to control external hemorrhage                      | % of patients with active external bleeding who have physical maneuvers applied to control hemorrhage                            | — | — | ✓ |
| Tetanus vaccination updated for susceptible adult patients       | % of patients age > 18 with open wound and documentation of tetanus vaccination given (or patient's reported recent vaccination) | — | — | ✓ |

#### Documentation and Assessment Quality Indicators

| Indicator                                        | Definition                                                                   | Exact match | Near match | No data |
|--------------------------------------------------|------------------------------------------------------------------------------|-------------|------------|---------|
| Recording of initial complete vital signs        | % of patient encounters with recording of initial completed vital signs (VS) | ✓           | ✓          | —       |
| Recording of demographics and chief complaint    | % of charts with recording of chief complaint and demographics               | ✓           | ✓          | —       |
| Documentation of diagnosis                       | % of patients with documented diagnosis d. d.                                | ✓           | ✓          | —       |
| Documentation of disposition                     | % of patients with documented disposition                                    | ✓           | ✓          | —       |
| Rate of triage                                   | % of patients arriving to the EU receiving a triage score                    | ✓           | —          | —       |
| Triage level categorisation                      | % of patients by triage level                                                | ✓           | —          | —       |
| Primary survey performed for all trauma patients | % of patients with chief complaint of trauma with documented primary survey  | —           | ✓          | —       |

|                                                               |                                                                                                                |   |   |   |
|---------------------------------------------------------------|----------------------------------------------------------------------------------------------------------------|---|---|---|
| Initial assessment for all patients                           | % of patients receiving an initial assessment                                                                  | — | ✓ | — |
| Documentation of reason for transfer                          | % of patients with documented reason for transfer                                                              | — | — | ✓ |
| Vital signs recorded every 15 min for highest acuity patients | % of patients with highest triage priority who have VS recorded every 15 min in the first hour of presentation | — | — | ✓ |

#### Clinical Outcome Quality Indicators

| Indicator                                                | Definition                                                                                  | Exact match | Near match | No data |
|----------------------------------------------------------|---------------------------------------------------------------------------------------------|-------------|------------|---------|
| Mortality from trauma                                    | % of patients with trauma-related chief complaint who die within 24hours of EU presentation | ✓           | ✓          | —       |
| Mortality from lower respiratory tract infection (adult) | % of adult patients with diagnosis of LRTI who die within 24hours of EU presentation        | ✓           | ✓          | —       |
| Mortality from asthma                                    | % of patients with diagnosis of asthma who die within 24hours of EU presentation            | ✓           | ✓          | —       |
| Left without being seen                                  | % of patients registered in the EU who left without being seen by a provider                | ✓           | —          | —       |
| Mortality from lower respiratory tract infection (child) | % of patients <5years with diagnosis of LRTI who die within 24hours of EU presentation      | —           | ✓          | —       |

From: Broccoli MC, Moresky R, Dixon J, Muya I, Taubman C, Wallis LA, Hynes EJ. Defining quality indicators for emergency care delivery: findings of an expert consensus process by emergency care practitioners in Africa. *BMJ Global Health*. 2018 Feb 1;3(1):e000479.
